# Supplementary material for: Comparative Analysis of the GNAI Family Genes in Glioblastoma through Transcriptomics and Single-Cell Technologies
Source: MDPI journal article supplement (doi:10.3390/cancers15205112), 2023-10-23
Supplement: s1 [file s1]

(A)

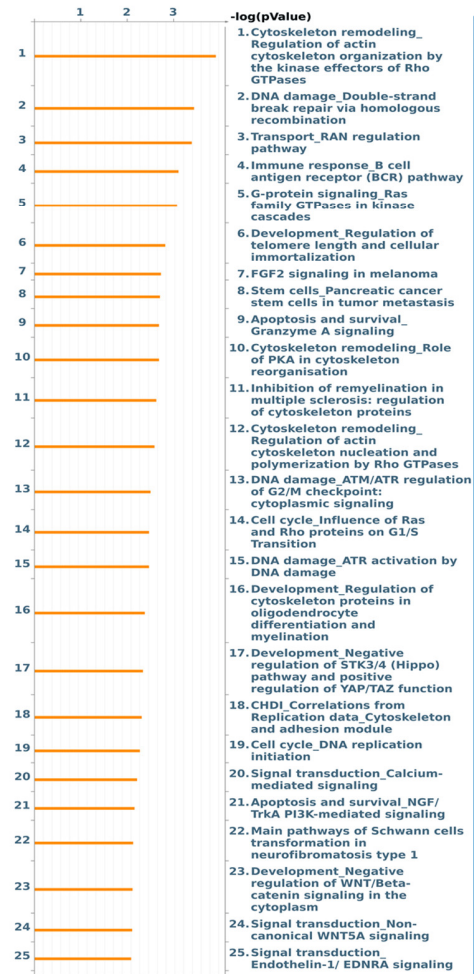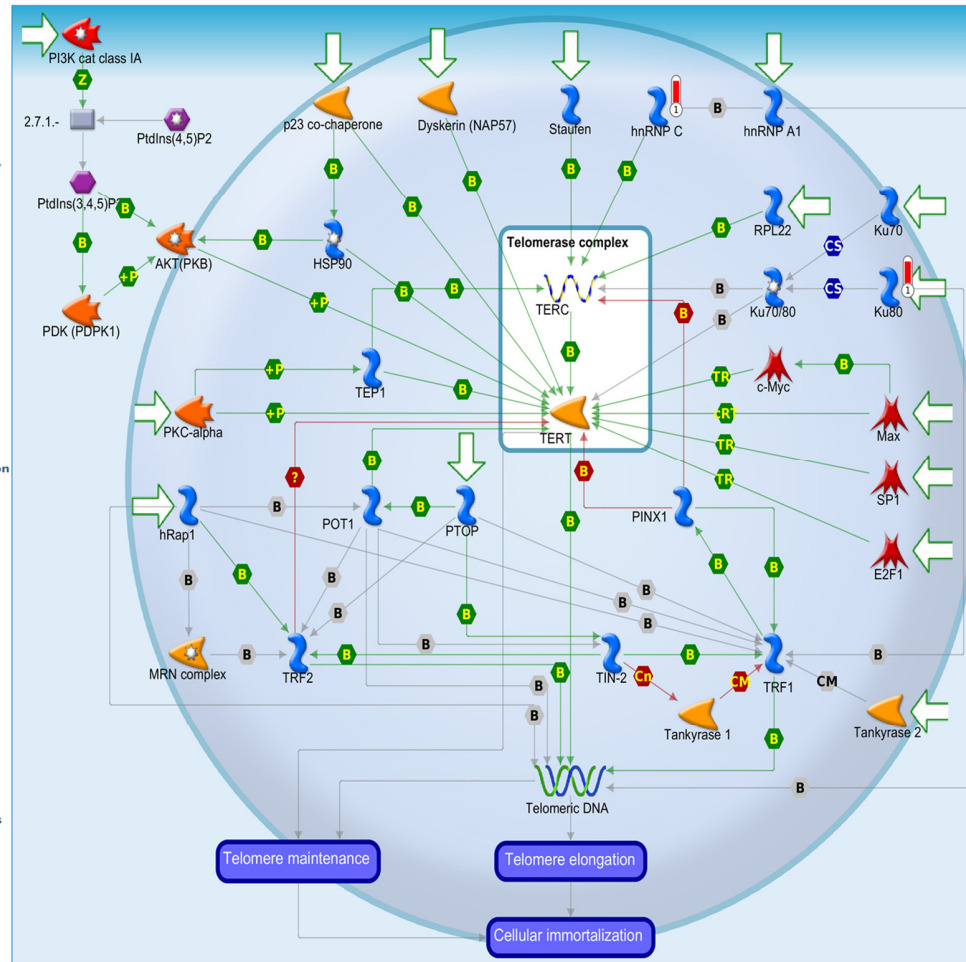

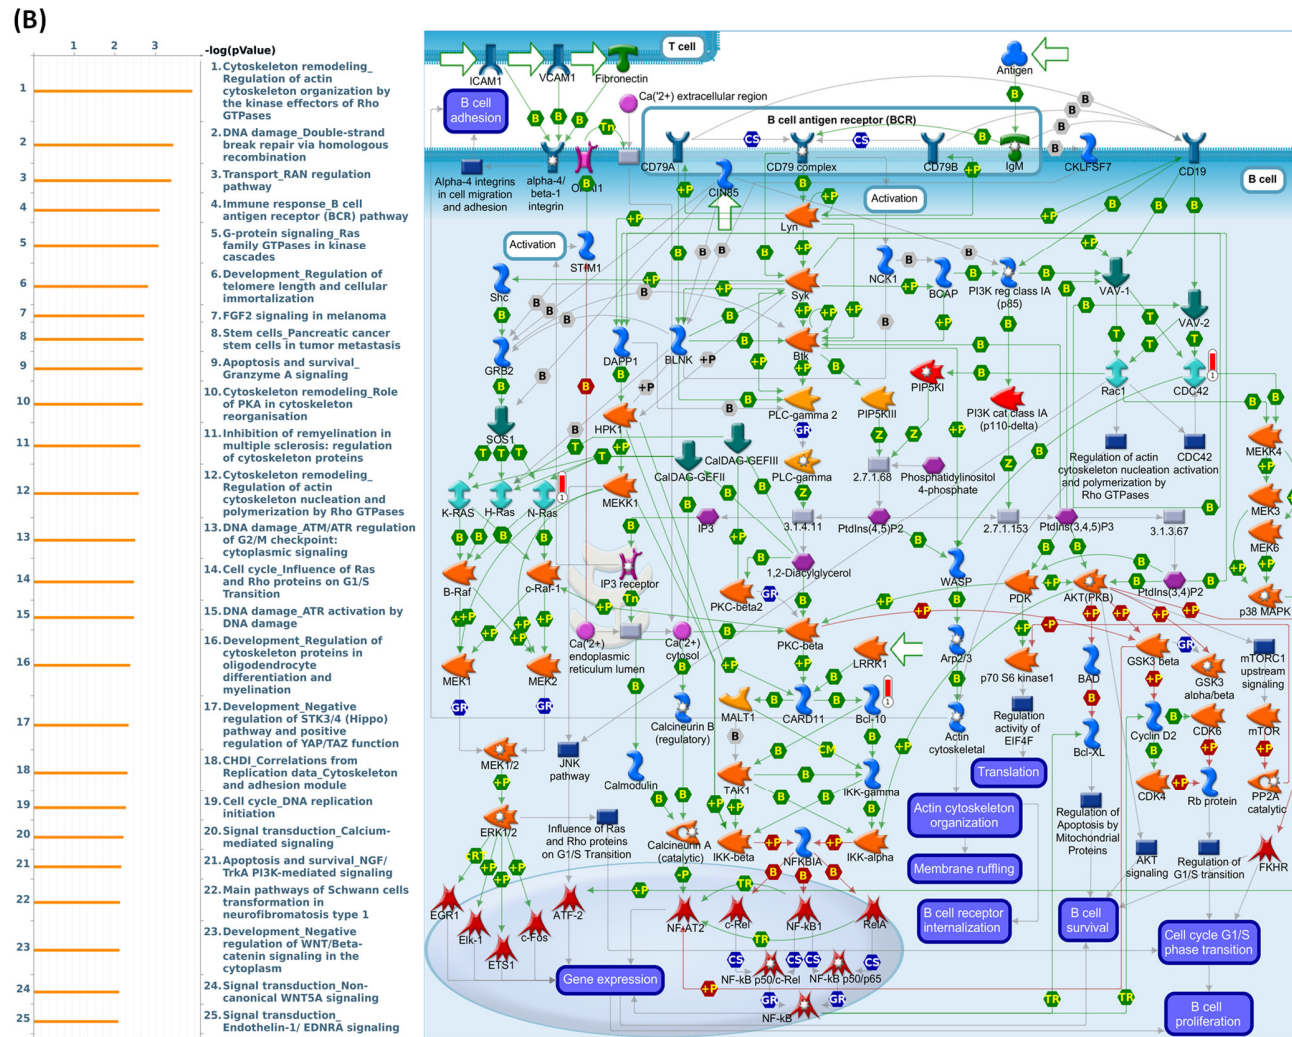

**Supplementary Figure S1: Expression of the *GNAI3* signaling pathway in GBM.** Using the MetaCore platform to analyze genes co-expressed with *GNAI3* from associated TCGA dataset, we found that (A) “Development Regulation of telomere length and cellular immortalization” and (B) “Immune response\_B cell antigen receptor (BCR) pathway” were linked to GBM progression (with  $p < 0.05$  set as the cutoff value).

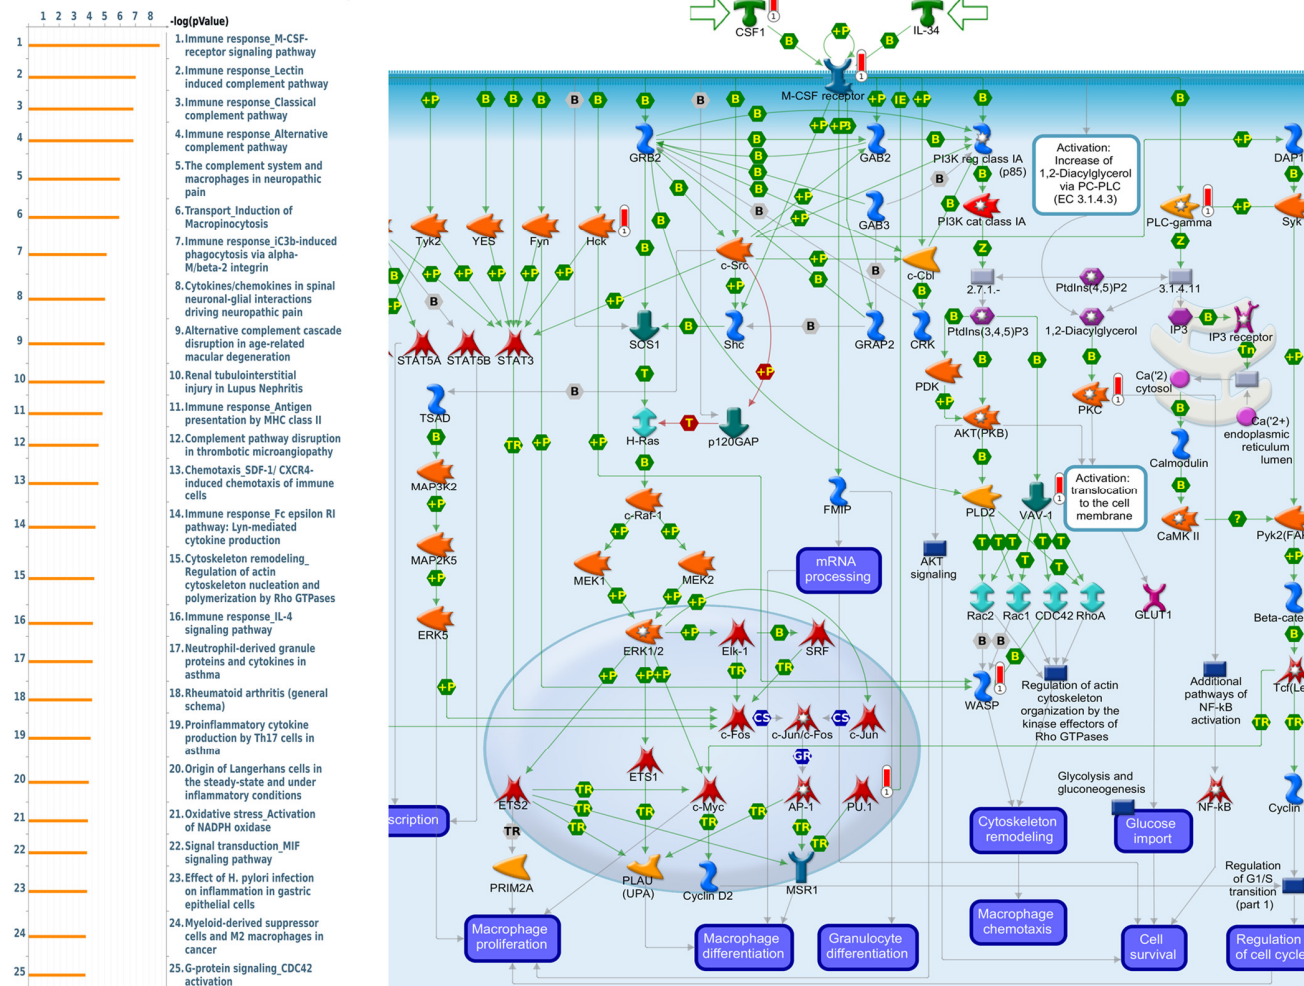

**Supplementary Figure S2: Expression of the *GNAI2* signaling pathway in GBM.** Using the MetaCore platform to analyze genes co-expressed with *GNAI2* from associated TCGA dataset, we found that "Immune response M-CSF-receptor signaling pathway" was linked to GBM (with  $p < 0.05$  set as the cutoff value).



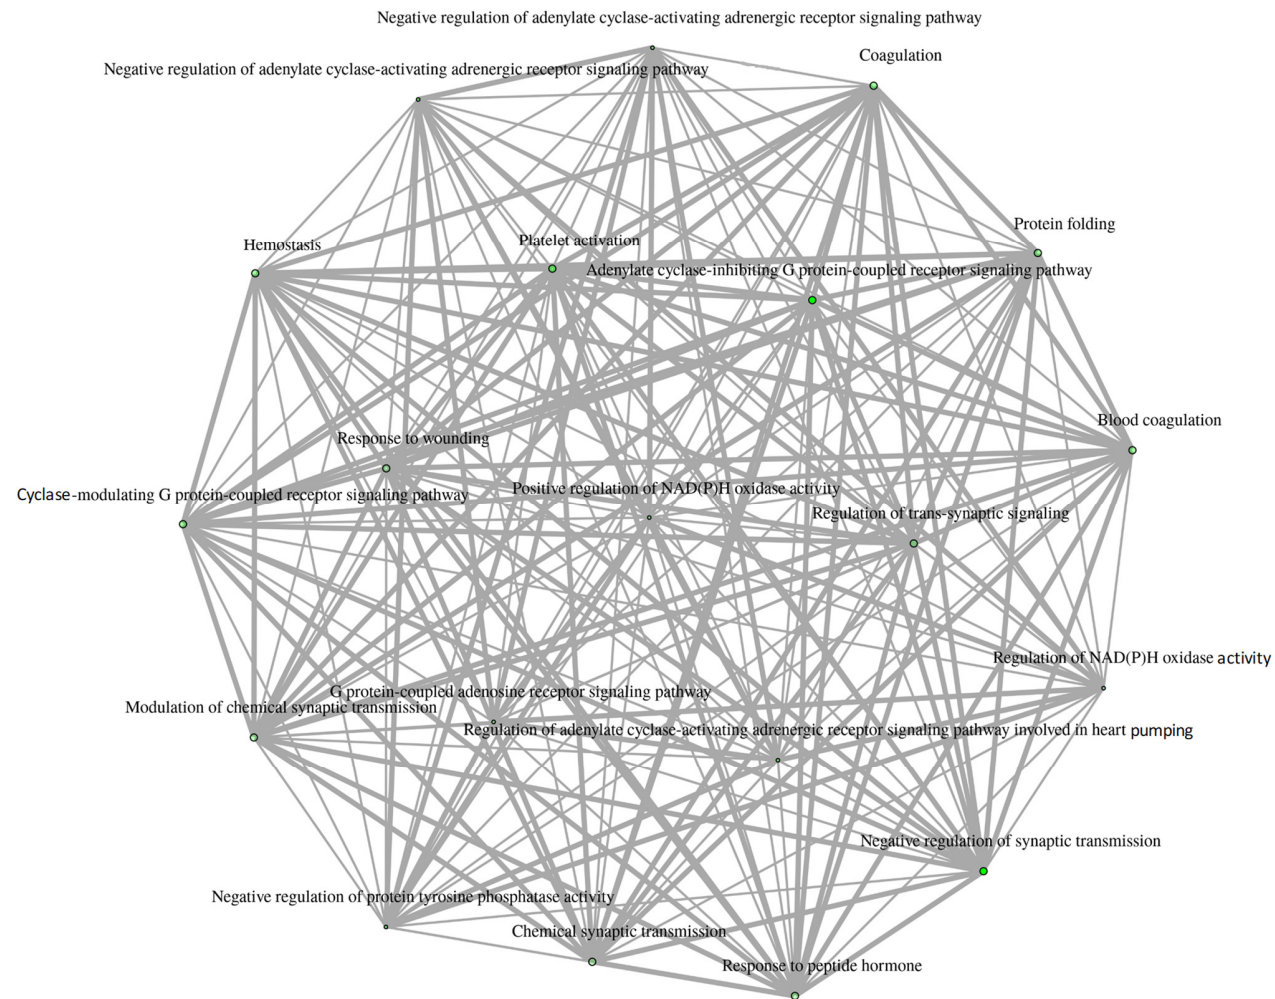

**Supplementary Figure S3: Pathway analysis.** Positively and negatively regulated pathways by *GNAI3*.

**Supplementary Table S1.** Top 163 genes used for MetaCore Analysis of *GNAI2*.

| Sr. No. | Correlated Gene | Spearman's Correlation | p-Value  |
|---------|-----------------|------------------------|----------|
| 1.      | SHISA5          | 0.597114628            | 2.24E-15 |
| 2.      | MVP             | 0.594048181            | 3.38E-15 |
| 3.      | KCNQ1           | 0.568125658            | 9.14E-14 |
| 4.      | TWF2            | 0.56789482             | 9.40E-14 |
| 5.      | SPI1            | 0.556022674            | 3.87E-13 |
| 6.      | RAB43           | 0.555066131            | 4.32E-13 |
| 7.      | TNFRSF1B        | 0.548874193            | 8.83E-13 |
| 8.      | CD4             | 0.548275862            | 9.45E-13 |
| 9.      | P2RY6           | 0.547228783            | 1.06E-12 |
| 10.     | TYMP            | 0.544729177            | 1.41E-12 |
| 11.     | CD74            | 0.544402456            | 1.46E-12 |
| 12.     | VAV1            | 0.543378995            | 1.64E-12 |
| 13.     | TAPBP           | 0.543272713            | 1.66E-12 |
| 14.     | TGFB1           | 0.542619273            | 1.79E-12 |
| 15.     | MYO1F           | 0.5425681              | 1.80E-12 |
| 16.     | WAS             | 0.542225634            | 1.87E-12 |
| 17.     | RASAL3          | 0.539269406            | 2.60E-12 |
| 18.     | SIPA1           | 0.537742088            | 3.07E-12 |
| 19.     | MAN1C1          | 0.537734215            | 3.07E-12 |
| 20.     | SERPINA1        | 0.536171469            | 3.65E-12 |
| 21.     | NAGA            | 0.533998583            | 4.62E-12 |
| 22.     | FMNL1           | 0.533120768            | 5.08E-12 |
| 23.     | CARD9           | 0.532971186            | 5.17E-12 |
| 24.     | IL4R            | 0.532510628            | 5.43E-12 |
| 25.     | BATF            | 0.532400409            | 5.50E-12 |
| 26.     | IL2RB           | 0.532357109            | 5.52E-12 |
| 27.     | CSF1R           | 0.531006928            | 6.39E-12 |
| 28.     | ARHGAP45        | 0.528164856            | 8.66E-12 |
| 29.     | GM2A            | 0.526610501            | 1.02E-11 |
| 30.     | RHBDF2          | 0.525972288            | 1.09E-11 |
| 31.     | A2M             | 0.522492521            | 1.58E-11 |
| 32.     | AP1B1           | 0.521941427            | 1.67E-11 |
| 33.     | GPR132          | 0.52132735             | 1.78E-11 |
| 34.     | TRPV2           | 0.519634703            | 2.12E-11 |
| 35.     | PLCG2           | 0.518878917            | 2.29E-11 |
| 36.     | PALD1           | 0.518878917            | 2.29E-11 |
| 37.     | ITGB2           | 0.518666352            | 2.35E-11 |
| 38.     | VDR             | 0.518615689            | 2.36E-11 |
| 39.     | RHOG            | 0.518571878            | 2.37E-11 |
| 40.     | RIN3            | 0.515973862            | 3.09E-11 |
| 41.     | GRN             | 0.515580224            | 3.22E-11 |

|     |         |             |          |
|-----|---------|-------------|----------|
| 42. | PLEKHO2 | 0.515147221 | 3.37E-11 |
| 43. | CTSZ    | 0.514088333 | 3.75E-11 |
| 44. | DEF6    | 0.512190994 | 4.55E-11 |
| 45. | PRKCD   | 0.511738309 | 4.76E-11 |
| 46. | GIMAP1  | 0.511065187 | 5.09E-11 |
| 47. | CORO1A  | 0.510108644 | 5.61E-11 |
| 48. | HCK     | 0.50988427  | 5.74E-11 |
| 49. | ADPRH   | 0.509364667 | 6.04E-11 |
| 50. | CSF1    | 0.509041883 | 6.24E-11 |
| 51. | HCLS1   | 0.508514407 | 6.58E-11 |
| 52. | ARHGAP4 | 0.508297906 | 6.73E-11 |
| 53. | LILRB1  | 0.507778303 | 7.08E-11 |
| 54. | PPP1R18 | 0.50767202  | 7.16E-11 |
| 55. | SH3TC1  | 0.507593292 | 7.22E-11 |
| 56. | TMEM109 | 0.507375821 | 7.37E-11 |
| 57. | GPR84   | 0.506313966 | 8.19E-11 |
| 58. | DENND1C | 0.50621162  | 8.28E-11 |
| 59. | PTPN6   | 0.503873406 | 1.04E-10 |
| 60. | ANO10   | 0.503231775 | 1.11E-10 |
| 61. | C3      | 0.502755472 | 1.16E-10 |
| 62. | TKT     | 0.502523225 | 1.19E-10 |
| 63. | CIITA   | 0.502082349 | 1.24E-10 |
| 64. | ABI3    | 0.501657219 | 1.30E-10 |
| 65. | TFE3    | 0.500440875 | 1.46E-10 |
| 66. | MYD88   | 0.500307038 | 1.48E-10 |
| 67. | PLXND1  | 0.498783656 | 1.71E-10 |
| 68. | STYXL2  | 0.498437254 | 1.77E-10 |
| 69. | DOCK2   | 0.497870414 | 1.87E-10 |
| 70. | TMEM102 | 0.497829572 | 1.88E-10 |
| 71. | FERMT3  | 0.49722091  | 1.99E-10 |
| 72. | C1R     | 0.496760353 | 2.08E-10 |
| 73. | ARPC1B  | 0.495599118 | 2.33E-10 |
| 74. | NCKAP1L | 0.495158243 | 2.43E-10 |
| 75. | OSCAR   | 0.494229255 | 2.66E-10 |
| 76. | GNA15   | 0.494048668 | 2.70E-10 |
| 77. | STXBP2  | 0.492776728 | 3.05E-10 |
| 78. | LRRC25  | 0.492497245 | 3.13E-10 |
| 79. | SUSD6   | 0.49143442  | 3.46E-10 |
| 80. | NLRP3   | 0.491139191 | 3.56E-10 |
| 81. | LAIR1   | 0.489178869 | 4.28E-10 |
| 82. | TMC8    | 0.488588411 | 4.53E-10 |
| 83. | SLC15A3 | 0.488549047 | 4.55E-10 |
| 84. | TRPM2   | 0.488446701 | 4.59E-10 |

|      |          |             |          |
|------|----------|-------------|----------|
| 85.  | LPAR5    | 0.48837191  | 4.62E-10 |
| 86.  | RFTN1    | 0.488100299 | 4.74E-10 |
| 87.  | FCGR3A   | 0.487694851 | 4.92E-10 |
| 88.  | HLA-E    | 0.485628248 | 5.97E-10 |
| 89.  | MYOF     | 0.484309558 | 6.74E-10 |
| 90.  | ARHGAP30 | 0.484156038 | 6.84E-10 |
| 91.  | CYB561D2 | 0.482341364 | 8.09E-10 |
| 92.  | ADGRE1   | 0.482156353 | 8.22E-10 |
| 93.  | TOR4A    | 0.482057944 | 8.30E-10 |
| 94.  | IL21R    | 0.481715478 | 8.56E-10 |
| 95.  | LGALS3BP | 0.480963628 | 9.17E-10 |
| 96.  | CCR5     | 0.480806172 | 9.31E-10 |
| 97.  | CCR1     | 0.480782554 | 9.33E-10 |
| 98.  | ALOX5    | 0.480160605 | 9.87E-10 |
| 99.  | C1S      | 0.479794521 | 1.02E-09 |
| 100. | STAC3    | 0.479274917 | 1.07E-09 |
| 101. | PTPN7    | 0.47749567  | 1.26E-09 |
| 102. | NFAM1    | 0.47739726  | 1.27E-09 |
| 103. | WDFY4    | 0.477180759 | 1.29E-09 |
| 104. | VASP     | 0.477039049 | 1.31E-09 |
| 105. | PLCB2    | 0.476873721 | 1.33E-09 |
| 106. | SASH3    | 0.47668871  | 1.35E-09 |
| 107. | G6PD     | 0.474370178 | 1.67E-09 |
| 108. | RPS6KA1  | 0.474267832 | 1.68E-09 |
| 109. | PLA2G15  | 0.474039521 | 1.72E-09 |
| 110. | MSN      | 0.473626201 | 1.78E-09 |
| 111. | EBI3     | 0.473393954 | 1.82E-09 |
| 112. | DOK3     | 0.472716895 | 1.93E-09 |
| 113. | MAPKAPK3 | 0.472272083 | 2.01E-09 |
| 114. | ENG      | 0.471276177 | 2.19E-09 |
| 115. | CNPY3    | 0.470736892 | 2.30E-09 |
| 116. | TBXAS1   | 0.470732955 | 2.30E-09 |
| 117. | LGALS9   | 0.470567627 | 2.34E-09 |
| 118. | ITGAM    | 0.470421981 | 2.37E-09 |
| 119. | SCIN     | 0.470398362 | 2.37E-09 |
| 120. | THEMIS2  | 0.469563848 | 2.55E-09 |
| 121. | CAPZB    | 0.468686034 | 2.76E-09 |
| 122. | MAN2B1   | 0.46830814  | 2.85E-09 |
| 123. | CYTH4    | 0.468119194 | 2.90E-09 |
| 124. | ITGB5    | 0.467945993 | 2.94E-09 |
| 125. | LILRB4   | 0.467390962 | 3.09E-09 |
| 126. | CD14     | 0.466871359 | 3.23E-09 |
| 127. | HLA-DMA  | 0.46685955  | 3.24E-09 |

|      |          |             |          |
|------|----------|-------------|----------|
| 128. | CARD11   | 0.466517084 | 3.34E-09 |
| 129. | LAPTM5   | 0.465639728 | 3.60E-09 |
| 130. | MAPKAPK2 | 0.465320422 | 3.70E-09 |
| 131. | SYNGR2   | 0.464478035 | 3.98E-09 |
| 132. | LYL1     | 0.463907259 | 4.18E-09 |
| 133. | RAC2     | 0.462545268 | 4.71E-09 |
| 134. | IKZF1    | 0.462045347 | 4.91E-09 |
| 135. | ATG7     | 0.460742403 | 5.50E-09 |
| 136. | APOL3    | 0.460018107 | 5.85E-09 |
| 137. | CDCP1    | 0.459715006 | 6.00E-09 |
| 138. | STAT6    | 0.459215084 | 6.26E-09 |
| 139. | KCNK6    | 0.458845064 | 6.46E-09 |
| 140. | IL16     | 0.458845064 | 6.46E-09 |
| 141. | LPXN     | 0.458723036 | 6.53E-09 |
| 142. | ACAA1    | 0.458034168 | 6.92E-09 |
| 143. | CD44     | 0.457109117 | 7.49E-09 |
| 144. | LTC4S    | 0.456542277 | 7.86E-09 |
| 145. | CAPG     | 0.456506849 | 7.88E-09 |
| 146. | CD33     | 0.456373012 | 7.97E-09 |
| 147. | ARHGDIB  | 0.456148638 | 8.12E-09 |
| 148. | HCST     | 0.455967564 | 8.25E-09 |
| 149. | MAP4K1   | 0.455715635 | 8.43E-09 |
| 150. | FLVCR2   | 0.454995276 | 8.95E-09 |
| 151. | PCED1B   | 0.454885057 | 9.04E-09 |
| 152. | CXCL16   | 0.454396945 | 9.41E-09 |
| 153. | CYP2S1   | 0.453700205 | 9.98E-09 |
| 154. | CD68     | 0.453279011 | 1.03E-08 |
| 155. | DENND3   | 0.45160211  | 1.19E-08 |
| 156. | SIGLEC9  | 0.451562746 | 1.19E-08 |
| 157. | ICOSLG   | 0.451531255 | 1.20E-08 |
| 158. | DOK1     | 0.451511573 | 1.20E-08 |
| 159. | CMTM7    | 0.451090379 | 1.24E-08 |
| 160. | RASGRP4  | 0.451070698 | 1.24E-08 |
| 161. | SELPLG   | 0.450740041 | 1.28E-08 |
| 162. | ACTN1    | 0.450452685 | 1.31E-08 |
| 163. | TRADD    | 0.450003936 | 1.36E-08 |



**Supplementary Table S2.** Top 126 genes used for MetaCore Analysis of *GNAI3*.

| Sr. No. | Correlated Gene | Spearman's Correlation | p-Value  |
|---------|-----------------|------------------------|----------|
| 1.      | NRAS            | 0.771008503            | 8.12E-30 |
| 2.      | DNTTIP2         | 0.627708235            | 2.93E-17 |
| 3.      | LRRC42          | 0.61110455             | 3.27E-16 |
| 4.      | DR1             | 0.588171154            | 7.33E-15 |
| 5.      | KATNA1          | 0.586214769            | 9.45E-15 |
| 6.      | RBM7            | 0.581657004            | 1.70E-14 |
| 7.      | BCL10           | 0.57914108             | 2.33E-14 |
| 8.      | NUP54           | 0.577786963            | 2.77E-14 |
| 9.      | BZW1            | 0.57288616             | 5.10E-14 |
| 10.     | PEX13           | 0.566186427            | 1.16E-13 |
| 11.     | DDX20           | 0.561210833            | 2.10E-13 |
| 12.     | GLO1            | 0.559348921            | 2.62E-13 |
| 13.     | SNIP1           | 0.554121398            | 4.83E-13 |
| 14.     | SERBP1          | 0.554117462            | 4.83E-13 |
| 15.     | UTP11           | 0.553578177            | 5.14E-13 |
| 16.     | HAT1            | 0.550740041            | 7.13E-13 |
| 17.     | LRRC40          | 0.549122185            | 8.58E-13 |
| 18.     | SIKE1           | 0.548181389            | 9.55E-13 |
| 19.     | HNRNPLL         | 0.545000787            | 1.37E-12 |
| 20.     | CDC42           | 0.542757046            | 1.76E-12 |
| 21.     | NMD3            | 0.542649329            | 1.78E-12 |
| 22.     | C1ORF109        | 0.5382302              | 2.91E-12 |
| 23.     | CDC73           | 0.536675327            | 3.45E-12 |
| 24.     | PPP1R8          | 0.53540781             | 3.97E-12 |
| 25.     | SZRD1           | 0.532534247            | 5.42E-12 |
| 26.     | SDE2            | 0.531762715            | 5.89E-12 |
| 27.     | KPNA4           | 0.529589828            | 7.44E-12 |
| 28.     | RPAP2           | 0.527586207            | 9.21E-12 |
| 29.     | RBBP8           | 0.524303259            | 1.30E-11 |
| 30.     | SF3A3           | 0.52128405             | 1.79E-11 |
| 31.     | BRX1            | 0.520382617            | 1.96E-11 |
| 32.     | TXNDC12         | 0.520122815            | 2.02E-11 |
| 33.     | PPIL4           | 0.519847268            | 2.08E-11 |
| 34.     | FAF1            | 0.51515903             | 3.36E-11 |
| 35.     | CAPZA1          | 0.514840183            | 3.47E-11 |
| 36.     | HNRNPC          | 0.514773264            | 3.50E-11 |
| 37.     | MCMBP           | 0.513836404            | 3.85E-11 |
| 38.     | CMPK1           | 0.51209652             | 4.59E-11 |
| 39.     | BCAS2           | 0.509474886            | 5.98E-11 |
| 40.     | MARCHF7         | 0.508353015            | 6.69E-11 |
| 41.     | RNF138          | 0.508199496            | 6.79E-11 |

|     |          |             |          |
|-----|----------|-------------|----------|
| 42. | XRCC5    | 0.506077783 | 8.39E-11 |
| 43. | DHX40    | 0.505310187 | 9.05E-11 |
| 44. | BLOC1S5  | 0.502881436 | 1.15E-10 |
| 45. | RPF1     | 0.502558652 | 1.19E-10 |
| 46. | HSPA13   | 0.502334278 | 1.21E-10 |
| 47. | PPP1CB   | 0.501696583 | 1.29E-10 |
| 48. | GPX7     | 0.501428909 | 1.33E-10 |
| 49. | SNRNP40  | 0.500957035 | 1.39E-10 |
| 50. | ATG5     | 0.500826641 | 1.41E-10 |
| 51. | USP1     | 0.499917336 | 1.54E-10 |
| 52. | SEC22B   | 0.498771847 | 1.72E-10 |
| 53. | C3ORF38  | 0.497834987 | 1.88E-10 |
| 54. | PPIH     | 0.495638482 | 2.32E-10 |
| 55. | CNN3     | 0.495099197 | 2.44E-10 |
| 56. | APH1A    | 0.494327665 | 2.63E-10 |
| 57. | ABCB7    | 0.49355465  | 2.83E-10 |
| 58. | MAGOH    | 0.493347504 | 2.89E-10 |
| 59. | RIT1     | 0.493253031 | 2.92E-10 |
| 60. | NPM1     | 0.490674697 | 3.72E-10 |
| 61. | PAIP1    | 0.489497717 | 4.16E-10 |
| 62. | METAP2   | 0.48611636  | 5.70E-10 |
| 63. | SMNDC1   | 0.486002204 | 5.76E-10 |
| 64. | DESI2    | 0.485923477 | 5.81E-10 |
| 65. | SLC25A24 | 0.485581011 | 5.99E-10 |
| 66. | SLC16A1  | 0.485045662 | 6.30E-10 |
| 67. | YTHDF2   | 0.484130928 | 6.86E-10 |
| 68. | TBCE     | 0.483148323 | 7.51E-10 |
| 69. | CDK2     | 0.482782239 | 7.76E-10 |
| 70. | TMED5    | 0.482605102 | 7.89E-10 |
| 71. | TBC1D23  | 0.481746969 | 8.54E-10 |
| 72. | CENPL    | 0.481595892 | 8.66E-10 |
| 73. | WDR43    | 0.481215557 | 8.96E-10 |
| 74. | AKIRIN1  | 0.480266887 | 9.78E-10 |
| 75. | AK2      | 0.480164541 | 9.87E-10 |
| 76. | MRPL37   | 0.479786648 | 1.02E-09 |
| 77. | E2F6     | 0.479723666 | 1.03E-09 |
| 78. | TCEAL9   | 0.477582271 | 1.25E-09 |
| 79. | GNG12    | 0.476708392 | 1.35E-09 |
| 80. | COPB1    | 0.475680995 | 1.48E-09 |
| 81. | GLMN     | 0.475590926 | 1.49E-09 |
| 82. | KTI12    | 0.475299165 | 1.53E-09 |
| 83. | TMCO1    | 0.474145804 | 1.70E-09 |
| 84. | CSDE1    | 0.474039521 | 1.72E-09 |

|      |         |             |          |
|------|---------|-------------|----------|
| 85.  | TMEM38B | 0.473614391 | 1.78E-09 |
| 86.  | GPN1    | 0.471256495 | 2.20E-09 |
| 87.  | THG1L   | 0.471236813 | 2.20E-09 |
| 88.  | TIPRL   | 0.469752795 | 2.51E-09 |
| 89.  | GORAB   | 0.469697685 | 2.52E-09 |
| 90.  | ITGB3BP | 0.469469375 | 2.57E-09 |
| 91.  | ACTR3   | 0.469323729 | 2.61E-09 |
| 92.  | WDR3    | 0.468146749 | 2.89E-09 |
| 93.  | DEK     | 0.467678318 | 3.01E-09 |
| 94.  | COA7    | 0.46742639  | 3.08E-09 |
| 95.  | RLF     | 0.466131318 | 3.45E-09 |
| 96.  | ZNF644  | 0.464706345 | 3.90E-09 |
| 97.  | RBBP4   | 0.464541017 | 3.96E-09 |
| 98.  | POLR3C  | 0.464399307 | 4.01E-09 |
| 99.  | NAA50   | 0.464226106 | 4.07E-09 |
| 100. | CPSF3   | 0.463808849 | 4.22E-09 |
| 101. | GNL2    | 0.463804913 | 4.22E-09 |
| 102. | ZZZ3    | 0.463793103 | 4.23E-09 |
| 103. | ADH5    | 0.462368131 | 4.78E-09 |
| 104. | RBM34   | 0.461986301 | 4.94E-09 |
| 105. | SH3GLB1 | 0.461946937 | 4.96E-09 |
| 106. | CENPQ   | 0.461824909 | 5.01E-09 |
| 107. | BTF3L4  | 0.461006141 | 5.37E-09 |
| 108. | RSL1D1  | 0.460651866 | 5.54E-09 |
| 109. | MRPS30  | 0.459963451 | 5.87E-09 |
| 110. | ASNSD1  | 0.459061565 | 6.34E-09 |
| 111. | EIF3M   | 0.458490789 | 6.66E-09 |
| 112. | YRDC    | 0.458207369 | 6.82E-09 |
| 113. | CALU    | 0.457778303 | 7.08E-09 |
| 114. | RRAGC   | 0.456317903 | 8.01E-09 |
| 115. | DDX59   | 0.455798748 | 8.37E-09 |
| 116. | ACADM   | 0.455573925 | 8.53E-09 |
| 117. | MFSD14A | 0.455239332 | 8.77E-09 |
| 118. | PRPF4   | 0.454420564 | 9.39E-09 |
| 119. | TRMT10C | 0.454117462 | 9.64E-09 |
| 120. | MIER1   | 0.454003307 | 9.73E-09 |
| 121. | PLRG1   | 0.453975752 | 9.75E-09 |
| 122. | TCEANC2 | 0.453798614 | 9.90E-09 |
| 123. | ZPR1    | 0.452633444 | 1.09E-08 |
| 124. | DUSP11  | 0.450358211 | 1.32E-08 |
| 125. | PRIM2   | 0.450314911 | 1.32E-08 |
| 126. | MYNN    | 0.450208629 | 1.33E-08 |

**Supplementary Table S3.** Top Correlated Pathways and C0-expressive genes linked with *GNAI2*.

| Sr. No. | Maps                                                                                                  | p-value   | Network Objects from Active Data                                |
|---------|-------------------------------------------------------------------------------------------------------|-----------|-----------------------------------------------------------------|
| 1       | Immune response_M-CSF-receptor signaling pathway                                                      | 2.608E-09 | PLC-gamma, PU.1, WASP, CSF1, VAV-1, M-CSF receptor, Hck, PKC    |
| 2       | Immune response_Lectin induced complement pathway                                                     | 1.028E-07 | C3, C3b, C3c, C3dg, iC3b, C3a                                   |
| 3       | Immune response_Classical complement pathway                                                          | 1.469E-07 | C3, C3b, C3c, C3dg, iC3b, C3a                                   |
| 4       | Immune response_Alternative complement pathway                                                        | 1.469E-07 | C3, C3b, C3c, C3dg, iC3b, C3a                                   |
| 5       | The complement system and macrophages in neuropathic pain                                             | 1.182E-06 | C3, PKC-delta, TNF-R2, C3b, TGF-beta 1, MyD88, C3a              |
| 6       | Transport_Induction of Macropinocytosis                                                               | 1.289E-06 | PLC-gamma, CORO1A(CLABP, TACO), RhoG, CSF1, M-CSF receptor, PKC |
| 7       | Immune response_iC3b-induced phagocytosis via alpha-M/beta-2 integrin                                 | 8.711E-06 | ITGB2, VAV-1, PLC-gamma 2, iC3b, PKC                            |
| 8       | Cytokines/chemokines in spinal neuronal-glial interactions driving neuropathic pain                   | 1.118E-05 | PLC-gamma, P2Y6, TNF-R2, CSF1, M-CSF receptor, PKC              |
| 9       | Alternative complement cascade disruption in age-related macular degeneration                         | 1.185E-05 | C3, C3b, iC3b, C3a                                              |
| 10      | Renal tubulointerstitial injury in Lupus Nephritis                                                    | 1.192E-05 | TNF-R2, CSF1, M-CSF receptor, TGF-beta 1, CD4                   |
| 11      | Immune response_Antigen presentation by MHC class II                                                  | 1.672E-05 | CD74, PKC-delta, CD4, PKC, MyD88, HCLS1                         |
| 12      | Complement pathway disruption in thrombotic microangiopathy                                           | 3.013E-05 | C3, C3b, PKC, C3a                                               |
| 13      | Chemotaxis_SDF-1/ CXCR4-induced chemotaxis of immune cells                                            | 3.097E-05 | ITGB2, WASP, SFK, VAV-1, PLC-gamma 2                            |
| 14      | Immune response_Fc epsilon RI pathway: Lyn-mediated cytokine production                               | 4.936E-05 | CARD9, PLC-gamma, PKC-delta, VAV-1, PKC                         |
| 15      | Cytoskeleton remodeling_Regulation of actin cytoskeleton nucleation and polymerization by Rho GTPases | 5.835E-05 | WASP, FMNL1, Rac1-related, DRF                                  |
| 16      | Immune response_IL-4 signaling pathway                                                                | 7.153E-05 | PLC-gamma, IL4RA, PKC-delta, PLC-gamma 2, PKC                   |
| 17      | Neutrophil-derived granule proteins and cytokines in asthma                                           | 7.498E-05 | Hck, Alpha-defensin, TGF-beta 1, PKC                            |
| 18      | Rheumatoid arthritis (general schema)                                                                 | 8.122E-05 | TGF-beta, TNF-R2, CSF1, CD4                                     |
| 19      | Proinflammatory cytokine production by Th17 cells in asthma                                           | 1.022E-04 | C3, TGF-beta 1, CD4, C3a                                        |
| 20      | Origin of Langerhans cells in the steady-state and under inflammatory conditions                      | 1.361E-04 | CSF1, M-CSF receptor, TGF-beta 1                                |
| 21      | Oxidative stress_Activation of NADPH oxidase                                                          | 1.556E-04 | PLC-gamma, PKC-delta, VAV-1, PKC                                |
| 22      | Signal transduction_MIF signaling pathway                                                             | 1.772E-04 | CD74, PU.1, CD74-ICD, SFK                                       |

|    |                                                                                        |           |                                                      |
|----|----------------------------------------------------------------------------------------|-----------|------------------------------------------------------|
| 23 | Effect of H. pylori infection on inflammation in gastric epithelial cells              | 1.772E-04 | PLC-gamma, CD74, PLC-gamma 2, MyD88                  |
| 24 | Myeloid-derived suppressor cells and M2 macrophages in cancer                          | 2.135E-04 | IL4RA, CSF1, M-CSF receptor, TGF-beta 1              |
| 25 | G-protein signaling_CDC42 activation                                                   | 2.267E-04 | CSF1, VAV-1, M-CSF receptor, PKC                     |
| 26 | B-regulatory cells and tumor cells intercellular interaction                           | 2.549E-04 | IL4RA, TNF-R2, VDR, TGF-beta 1                       |
| 27 | Immune response_CD16 signaling in NK cells                                             | 2.856E-04 | WASP, VAV-1, PLC-gamma 2, SHP-1                      |
| 28 | Inhibition of neutrophil migration by proresolving lipid mediators in COPD             | 3.187E-04 | ITGB2, TNF-R2, VAV-1, PKC                            |
| 29 | Development_Transcription factors in segregation of hepatocytic lineage                | 3.494E-04 | A2M, TGF-beta 1, Alpha 1-antitrypsin                 |
| 30 | Development_G-CSF-induced myeloid differentiation                                      | 3.494E-04 | PU.1, ITGB2, SHP-1                                   |
| 31 | Immune response_IL-6 signaling pathway via MEK/ERK and PI3K/AKT cascades               | 3.736E-04 | PKC-delta, Proepithelin, VAV-1, Hck                  |
| 32 | G-protein signaling_Rac1 activation                                                    | 3.736E-04 | Rho GTPase, CORO1A(CLABP, TACO), Rac1-related, VAV-1 |
| 33 | COVID-19 associated coagulopathy                                                       | 4.137E-04 | C3, A2M, C3b, PKC                                    |
| 34 | Cell adhesion_Integrin inside-out signaling in neutrophils                             | 4.795E-04 | ITGB2, PKC-delta, Hck, PLC-gamma 2                   |
| 35 | Production and activation of TGF-beta in airway smooth muscle cells                    | 5.541E-04 | TGF-beta, TGF-beta 1, MyD88                          |
| 36 | Immune response_Th17, Th22 and Th9 cell differentiation                                | 7.635E-04 | PU.1, TGF-beta 1, CD4                                |
| 37 | Macrophage-induced immunosuppression in the tumor microenvironment                     | 1.039E-03 | ILT2, CSF1, M-CSF receptor, TGF-beta 1               |
| 38 | Immune response_IL-13 signaling via JAK-STAT                                           | 1.089E-03 | IL4RA, PKC-delta, SHP-1                              |
| 39 | Inhibition of remyelination in multiple sclerosis: regulation of cytoskeleton proteins | 1.089E-03 | TGF-beta, WASP, VAV-1                                |
| 40 | SLE genetic marker-specific pathways in B cells                                        | 1.122E-03 | PLC-gamma, PKC-delta, VAV-1, SHP-1                   |
| 41 | COVID-19: immune dysregulation                                                         | 1.164E-03 | CSF1, TGF-beta 1, CD4, MyD88                         |
| 42 | Macrophage and dendritic cell phenotype shift in cancer                                | 1.164E-03 | CSF1, M-CSF receptor, TGF-beta 1, SHP-1              |
| 43 | Immune response_Naive CD4+ T cell differentiation                                      | 1.239E-03 | PU.1, TGF-beta 1, CD4                                |
| 44 | Th9 cells in asthma                                                                    | 1.320E-03 | PU.1, TGF-beta, TGF-beta 1                           |
| 45 | Signal transduction_Delta-type opioid receptor signaling in non-neuronal cells         | 1.320E-03 | PKC-delta, VAV-1, PKC                                |
| 46 | Signal transduction_Adenosine A3 receptor signaling pathway                            | 1.403E-03 | Rho GTPase, PKC-delta, PKC                           |
| 47 | Th17 cells in CF (mouse model)                                                         | 1.490E-03 | TGF-beta 1, CD4, MyD88                               |
| 48 | Immune response_B cell antigen receptor (BCR) pathway                                  | 1.656E-03 | PLC-gamma, WASP, VAV-1, PLC-gamma 2                  |
| 49 | Immune response_T cell subsets: cell surface markers                                   | 1.769E-03 | IL4RA, TGF-beta 1, CD4                               |
| 50 | Immune response_Inhibitory PD-1 signaling in T cells                                   | 1.869E-03 | VAV-1, CD4, SHP-1                                    |

**Supplementary Table S4.** Top Correlated Pathways and C0-expressive genes linked with *GNAI3*.

| Sr. No. | Maps                                                                                                         | p-value   | Network Objects from Active Data    |
|---------|--------------------------------------------------------------------------------------------------------------|-----------|-------------------------------------|
| 1       | Cytoskeleton remodeling_Regulation of actin cytoskeleton organization by the kinase effectors of Rho GTPases | 1.230E-04 | Cdc42 subfamily, CDC42, MLCP (cat)  |
| 2       | DNA damage_Double-strand break repair via homologous recombination                                           | 3.690E-04 | RBBP8 (CtIP), NARF, Ku80            |
| 3       | Transport_RAN regulation pathway                                                                             | 4.132E-04 | NUP54, Importin (karyopherin)-alpha |
| 4       | Immune response_B cell antigen receptor (BCR) pathway                                                        | 8.123E-04 | CDC42, Bcl-10, N-Ras                |
| 5       | G-protein signaling_Ras family GTPases in kinase cascades                                                    | 8.705E-04 | CDC42, N-Ras                        |
| 6       | Development_Regulation of telomere length and cellular immortalization                                       | 1.579E-03 | hnRNP C, Ku80                       |
| 7       | FGF2 signaling in melanoma                                                                                   | 1.958E-03 | CDC42, N-Ras                        |
| 8       | Stem cells_Pancreatic cancer stem cells in tumor metastasis                                                  | 2.059E-03 | CDC42, MLCP (cat)                   |
| 9       | Apoptosis and survival_Granzyme A signaling                                                                  | 2.163E-03 | hnRNP C, Ku80                       |
| 10      | Cytoskeleton remodeling_Role of PKA in cytoskeleton reorganisation                                           | 2.163E-03 | CDC42, MLCP (cat)                   |
| 11      | Inhibition of remyelination in multiple sclerosis: regulation of cytoskeleton proteins                       | 2.487E-03 | CDC42, MLCP (cat)                   |
| 12      | Cytoskeleton remodeling_Regulation of actin cytoskeleton nucleation and polymerization by Rho GTPases        | 2.716E-03 | Cdc42 subfamily, CDC42              |
| 13      | DNA damage_ATM/ATR regulation of G2/M checkpoint: cytoplasmic signaling                                      | 3.329E-03 | MLCP (cat), PP1-cat                 |
| 14      | Cell cycle_Influence of Ras and Rho proteins on G1/S Transition                                              | 3.590E-03 | CDC42, MLCP (cat)                   |
| 15      | DNA damage_ATR activation by DNA damage                                                                      | 3.590E-03 | RBBP8 (CtIP), SNIP1                 |
| 16      | Development_Regulation of cytoskeleton proteins in oligodendrocyte differentiation and myelination           | 4.430E-03 | CDC42, MLCP (cat)                   |
| 17      | Development_Negative regulation of STK3/4 (Hippo) pathway and positive regulation of YAP/TAZ function        | 4.881E-03 | NEDD4, MLCP (cat)                   |
| 18      | CHDI_Correlations from Replication data_Cytoskeleton and adhesion module                                     | 5.193E-03 | CDC42, MLCP (cat)                   |
| 19      | Cell cycle_DNA replication initiation                                                                        | 5.678E-03 | MCMBP, Importin (karyopherin)-alpha |
| 20      | Signal transduction_Calcium-mediated signaling                                                               | 6.531E-03 | Bcl-10, MLCP (cat)                  |
| 21      | Apoptosis and survival_NGF/ TrkA PI3K-mediated signaling                                                     | 7.438E-03 | CDC42, MLCP (cat)                   |
| 22      | Main pathways of Schwann cells transformation in neurofibromatosis type 1                                    | 8.008E-03 | CDC42, N-Ras                        |
| 23      | Development_Negative regulation of WNT/Beta-catenin signaling in the cytoplasm                               | 8.203E-03 | FAF1, PP1-cat                       |
| 24      | Signal transduction_Non-canonical WNT5A signaling                                                            | 8.399E-03 | CDC42, MLCP (cat)                   |
| 25      | Signal transduction_Endothelin-1/ EDNRA signaling                                                            | 8.798E-03 | CDC42, MLCP (cat)                   |



|    |                                                                                                     |           |                              |
|----|-----------------------------------------------------------------------------------------------------|-----------|------------------------------|
| 26 | Immune response_CD28 signaling                                                                      | 9.413E-03 | CDC42, Bcl-10                |
| 27 | Immune response_Fc epsilon RI pathway: Lyn-mediated cytokine production                             | 9.413E-03 | CDC42, Bcl-10                |
| 28 | Development_The role of GDNF ligand family/ RET receptor in cell survival, growth and proliferation | 1.048E-02 | CDC42, N-Ras                 |
| 29 | Chemotaxis_Lysophosphatidic acid signaling via GPCRs                                                | 1.990E-02 | Rho GTPase, CDC42            |
| 30 | Cell cycle_Nucleocytoplasmic transport of CDK/Cyclins                                               | 2.349E-02 | Importin (karyopherin)-alpha |
| 31 | Cytoskeleton remodeling_Substance P mediated membrane blebbing                                      | 2.681E-02 | MLCP (cat)                   |
| 32 | Transition of Smoldering multiple myeloma to active multiple myeloma (schema)                       | 2.846E-02 | N-Ras                        |
| 33 | IL-1 production in melanoma                                                                         | 2.846E-02 | N-Ras                        |
| 34 | Multiple myeloma (general schema)                                                                   | 3.011E-02 | N-Ras                        |
| 35 | Anti-apoptotic pathways in endoplasmic reticulum stress response in multiple myeloma                | 3.176E-02 | PP1-cat                      |
| 36 | Immune response_ETV3 affect on CSF1-promoted macrophage differentiation                             | 3.176E-02 | DDX20                        |
| 37 | Inhibition of GSK3 beta by lithium in major depressive disorder                                     | 3.668E-02 | PP1-cat                      |
| 38 | Cytoskeleton remodeling_CDC42 in cellular processes                                                 | 3.832E-02 | CDC42                        |
| 39 | G-protein signaling_Cross-talk between Ras-family GTPases                                           | 3.832E-02 | CDC42                        |
| 40 | G-protein signaling_CDC42 inhibition                                                                | 3.995E-02 | CDC42                        |
| 41 | Development_ROBO2, ROBO3 and ROBO4 signaling pathways                                               | 4.158E-02 | CDC42                        |
| 42 | Defective macrophage-mediated bacterial phagocytosis in COPD                                        | 4.158E-02 | CDC42                        |
| 43 | Cell adhesion_Classical cadherin-mediated cell adhesion                                             | 4.321E-02 | CDC42                        |
| 44 | Brca1 in ovarian cancer                                                                             | 4.484E-02 | RBBP8 (CtIP)                 |
| 45 | Neurophysiological process_GABA-A receptor life cycle                                               | 4.484E-02 | PP1-cat                      |
| 46 | Role of Th17 cells in asthma                                                                        | 4.646E-02 | MLCP (cat)                   |
| 47 | Rho-dependent regulation of normal and asthmatic smooth muscle contraction                          | 4.646E-02 | MLCP (cat)                   |
| 48 | Regulation of Beta-catenin activity in melanoma                                                     | 4.646E-02 | N-Ras                        |
| 49 | DNA damage_Brca1 as a transcription regulator                                                       | 4.970E-02 | RBBP8 (CtIP)                 |
| 50 | Inhibition of Ephrin receptors in colorectal cancer                                                 | 4.970E-02 | CDC42                        |
